# Supplementary material for: Hematopoietic-Specific Deletion of Foxo1 Promotes NK Cell Specification and Proliferation
Source: Front Immunol. 2019 May 8;10:1016. doi: 10.3389/fimmu.2019.01016 (PMC6519137; doi:10.3389/fimmu.2019.01016)
Supplement: Supplementary file 1 [file Image_1.pdf]

# **Hematopoietic-specific Deletion of Foxo1 Promotes NK Cell Specification and Proliferation**

Pei Huang, Fangjie Wang, Yao Yang, Wenjing Lai, Meng Meng, Shuting Wu, Hongyan Peng, Lili Wang, Rixing Zhan, Saber Imani, Jianhua Yu, Bingbo Chen<sup>\*</sup>, Xiaohui Li<sup>\*</sup> and Youcai Deng<sup>\*</sup>

## **Supplemental Materials**

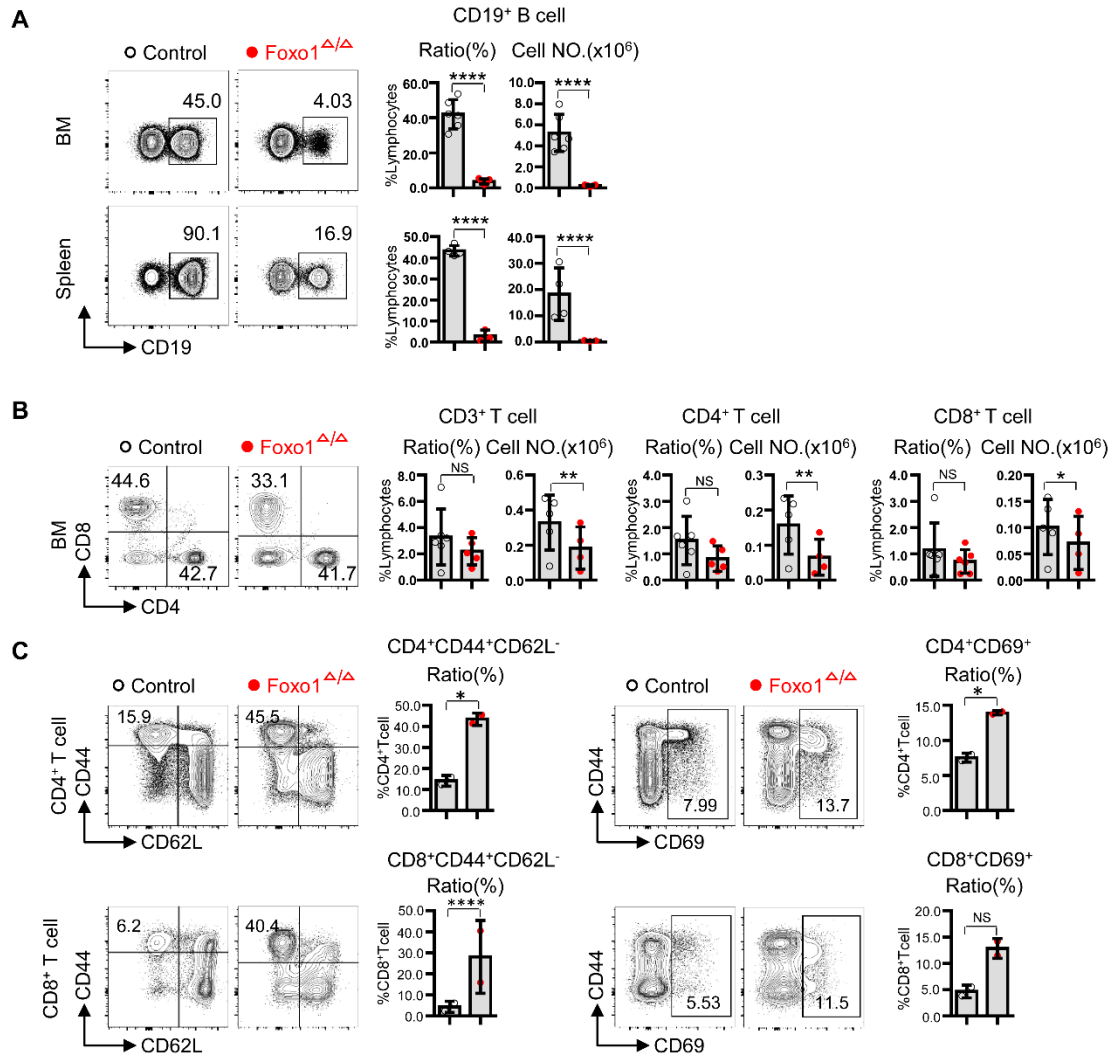

**Supplemental Figure 1 The effect of hematopoietic-specific deletion of Foxo1 on B cells and T cells.** (A) Frequency and enumeration of CD19<sup>+</sup> B cells (CD3<sup>-</sup>CD19<sup>+</sup>NKp46<sup>-</sup>) in the BM from control and Foxo1<sup>Δ/Δ</sup> mice. (B) Frequency and enumeration of CD4<sup>+</sup> T cells (CD3<sup>+</sup>CD4<sup>+</sup>CD8<sup>-</sup>) and CD8<sup>+</sup> T cells (CD3<sup>+</sup>CD4<sup>-</sup>CD8<sup>+</sup>) in the BM from control and Foxo1<sup>Δ/Δ</sup> mice. (C) Frequency of effector T cell: CD44<sup>+</sup>CD62L<sup>-</sup> and CD69<sup>+</sup> in CD4<sup>+</sup> T cells (CD3<sup>+</sup>CD4<sup>+</sup>CD8<sup>-</sup>) and CD8<sup>+</sup> T cells (CD3<sup>+</sup>CD4<sup>-</sup>CD8<sup>+</sup>) in the spleen. Each dot represents one mouse. At least 4 littermates were included for A and B, 2 littermates were included for C (Error bars indicate SD; unpaired Student's *t* test with generalized linear models; \**p* < 0.05, \*\* *p* < 0.01, \*\*\* *p* < 0.001, and \*\*\*\**p* < 0.0001, control versus Foxo1<sup>Δ/Δ</sup> mice).
